# Supplementary material for: Agricultural management and pesticide use reduce the phosphorus uptake capability of beneficial plant symbionts
Source: Research Square preprint supplement (doi:10.21203/rs.3.rs-827966/v1), 2021-08-26
Supplement: Supplementary file 2 [file 47087869f5ec0ee4c58270b6.xlsx]

## Sheet: Table S2
Table S2: Correlation matrix showing Spearman's correlation coefficient between predictors in grassland sites. The selected predictors used for the model-selection procedure are marked with an x. Correlation coefficient >0.80 are highlighted in bold. Significant correlations are indicated as *** p<0.001, ** p<0.01, * p<0.05. 'Location' refers to the geographic distance from the S-W-most sampling …
Used in model	Predictor	33P recovery	Location	Aridity	Annual precipitation	Annual temperature	Clay	Silt	Sand	pH	CaCO3	Nmin	Olsen-P	Soil C:N	Soil N:P	Nmin:Pmin	SOC	Microbial biomass C	Bacteria Shannon	Fungi Shannon	Cercocoa Shannon
	Location	-0.03
x	Aridity	-0.17	-0.39**
	Annual precipitation	0.22	0.16	-0.95***
x	Annual temperature	-0.05	-0.81***	0.65***	-0.47***
x	Clay	0.22	-0.08	-0.33*	0.35**	-0.11
x	Silt	-0.03	-0.21	-0.21	0.29*	-0.03	0.49***
	Sand	-0.02	0.15	0.22	-0.27*	0.05	-0.84***	-0.84***
x	pH	0.33**	-0.36**	0.51***	-0.41**	0.54***	-0.17	-0.01	0.09
	CaCO3	0.26*	-0.35**	0.41**	-0.32*	0.42***	-0.10	-0.02	0.07	0.81***
x	Nmin	-0.03	0.50***	-0.26*	0.21	-0.37**	-0.10	-0.14	0.18	-0.23	-0.26*
x	Olsen-P	-0.48***	0.05	0.27*	-0.28*	0.07	-0.25	0.07	0.02	-0.02	0.01	0.19
x	Soil C:N	-0.01	0.27*	0.24	-0.26*	-0.05	-0.13	-0.06	0.08	0.17	0.15	0.15	0.23
x	Soil N:P	0.28*	0.04	-0.07	0.08	-0.08	0.26*	-0.02	-0.08	0.05	0.07	0.07	-0.46***	0.00
	Nmin:Pmin	0.41**	0.24	-0.34**	0.32*	-0.27*	0.18	-0.16	0.08	-0.05	-0.12	0.34**	-0.81***	-0.09	0.51***
x	SOC	0.25	0.35**	-0.42***	0.40**	-0.38**	0.44***	0.32*	-0.39**	-0.05	0.01	0.30*	-0.10	0.30*	0.54***	0.30*
x	Microbial biomass C	0.39**	0.16	-0.55***	0.57***	-0.30*	0.54***	0.41**	-0.47***	0.01	0.02	0.21	-0.29*	-0.09	0.50***	0.39**	0.80***
x	Bacteria Shannon	-0.30*	-0.04	-0.09	0.09	0.06	-0.23	-0.05	0.16	-0.21	-0.27*	0.08	0.27*	-0.28*	-0.25	-0.24	-0.35**	-0.31*
x	Fungi Shannon	0.07	0.12	-0.16	0.14	-0.08	0.03	0.10	-0.06	0.00	0.00	0.06	-0.11	-0.06	0.09	0.06	0.11	0.17	0.11
x	Cercocoa Shannon	-0.29*	0.20	-0.06	-0.01	-0.12	-0.38**	-0.15	0.27*	-0.27*	-0.27*	0.21	0.34**	0.11	-0.23	-0.22	-0.05	-0.13	0.40**	0.10
x	Archaea Shannon	0.14	-0.13	0.26*	-0.21	0.27*	-0.22	-0.22	0.28*	0.23	0.16	0.13	-0.11	-0.04	-0.07	0.23	-0.23	-0.20	0.07	-0.13	0.11
