# Supplementary material for: Agricultural management and pesticide use reduce the phosphorus uptake capability of beneficial plant symbionts
Source: Research Square preprint supplement (doi:10.21203/rs.3.rs-827966/v1), 2021-08-26
Supplement: Supplementary file 3 [file 6048d85edcefea02a67d83ac.xlsx]

## Sheet: Table S3
Table S3: Correlation matrix showing Spearman's correlation coefficient between predictors in cropland soils. The selected predictors used for the model-selection procedure are marked with an x. Correlation coefficient >0.80 are highlighted in bold. Significant correlations are indicated as *** p<0.001, ** p<0.01, * p<0.05. 'Location' refers to the geographic distance from the S-W-most sampling s…
Used in model	Predictor	33P recovery	Location	Aridity	Annual precipitation	Annual temperature	Clay	Silt	Sand	pH	CaCO3	Nmin	Olsen-P	Soil C:N	Soil N:P	Soil Nmin:Pmin	SOC	Microbial biomass C	Soil bacteria Shannon	Soil fungi Shannon	Soil cercocoa Shannon	Soil archae Shannon	Organic fertilization	Crop cover	Crop Shannon	Tillage intensity	Fertilizer Nmin	Fungicide applications	Herbicide applications
	Location	-0.14
x	Aridity	-0.11	-0.30***
	Annual precipitation	0.13	-0.04	-0.91***
x	Annual temperature	0.03	-0.91***	0.42***	-0.08
x	Clay	0.13	0.05	-0.02	0.06	-0.08
x	Silt	0.12	0.13	-0.08	0.08	-0.24**	0.22**
	Sand	-0.11	-0.11	0.05	-0.06	0.19*	-0.82***	-0.69***
x	pH	0.15	-0.57***	0.23**	0.00	0.61***	-0.01	-0.16	0.12
	CaCO3	0.14	-0.55***	0.26**	-0.03	0.58***	0.01	-0.06	0.01	0.81***
x	Nmin	-0.11	0.39***	-0.33***	0.16*	-0.41***	-0.08	-0.06	0.10	-0.34***	-0.34***
x	Olsen-P	-0.07	0.32***	-0.31***	0.18*	-0.33***	-0.01	0.11	-0.05	-0.25**	-0.21*	0.21*
x	Soil C:N	-0.13	0.64***	0.07	-0.24**	-0.51***	0.15	0.08	-0.21*	-0.34***	-0.26**	0.10	0.12
x	Soil N:P	0.02	-0.27***	-0.08	0.22**	0.24**	0.40***	-0.07	-0.25**	0.20*	0.17*	-0.09	-0.54***	-0.17*
x	Soil Nmin:Pmin	0.01	0.04	0.00	-0.05	-0.05	-0.10	-0.10	0.13	-0.04	-0.11	0.56***	-0.62***	-0.04	0.28***
x	SOC	0.10	0.40***	-0.52***	0.39***	-0.45***	0.46***	0.19*	-0.45***	-0.24**	-0.14	0.35***	0.25**	0.32***	0.28***	0.04
x	Microbial biomass C	0.21*	-0.12	-0.60***	0.62***	0.01	0.23**	-0.03	-0.14	0.19*	0.15	0.15	-0.01	-0.29***	0.42***	0.11	0.58***
x	Soil bacteria Shannon	-0.02	0.38***	-0.60***	0.56***	-0.36***	-0.18*	0.06	0.13	-0.15	-0.25**	0.27***	0.29***	0.08	-0.16*	-0.06	0.13	0.17*
x	Soil fungi Shannon	0.12	0.08	-0.05	0.09	-0.06	0.18*	0.16	-0.22**	-0.09	-0.02	-0.07	-0.13	0.11	0.15	0.02	0.14	0.08	0.04
x	Soil cercocoa Shannon	0.01	0.25**	-0.23**	0.14	-0.28***	-0.27***	-0.04	0.20*	-0.29***	-0.31***	0.17*	0.29***	0.09	-0.23**	-0.12	0.01	-0.03	0.44***	0.04
x	Soil archae Shannon	-0.02	-0.47***	0.10	0.03	0.45***	-0.31***	-0.09	0.29***	0.32***	0.35***	-0.21*	-0.28***	-0.44***	0.00	0.10	-0.27***	0.09	-0.28***	-0.09	-0.23**
x	Organic fertilization	0.11	0.05	-0.59***	0.60***	-0.07	-0.21*	-0.05	0.21*	0.03	0.00	0.13	0.08	-0.25**	0.09	0.04	0.20*	0.58***	0.38***	0.08	0.13	0.15
x	Crop cover	0.11	0.02	-0.66***	0.71***	-0.01	-0.04	-0.13	0.11	0.09	0.07	0.07	0.17*	-0.19*	0.15	-0.10	0.29***	0.57***	0.54***	0.11	0.24**	-0.06	0.58***
x	Crop Shannon	0.14	0.14	-0.67***	0.69***	-0.20*	0.01	0.24**	-0.10	-0.16*	-0.18*	0.18*	0.20*	-0.15	0.07	-0.04	0.29***	0.44***	0.56***	0.05	0.17*	-0.10	0.47***	0.61***
x	Tillage intensity	0.19*	-0.17*	-0.22**	0.22**	0.10	0.04	-0.11	-0.03	0.14	0.09	0.00	-0.05	-0.19*	0.20*	0.04	0.11	0.28***	0.10	0.03	0.08	0.00	0.15	0.25**	0.02
x	Fertilizer Nmin	-0.19*	-0.02	-0.18*	0.30***	0.09	-0.04	-0.11	0.11	0.18*	0.14	0.11	0.15	0.12	-0.03	-0.11	0.00	-0.03	0.30***	-0.07	0.16*	-0.20*	0.12	0.26**	0.13	-0.06
x	Fungicide applications	-0.29***	-0.07	-0.06	0.15	0.16	-0.10	-0.19*	0.13	0.27***	0.18*	-0.02	0.16	0.12	0.03	-0.18*	-0.13	-0.11	0.20*	-0.23**	0.11	-0.12	0.00	0.17*	-0.03	0.06	0.65***
x	Herbicide applications	-0.13	-0.16*	0.26**	-0.19*	0.17*	0.05	0.08	-0.15	0.12	0.14	-0.05	0.05	0.21**	-0.09	-0.04	-0.08	-0.22**	-0.14	-0.04	-0.11	-0.20*	-0.38***	-0.20*	-0.28***	-0.08	0.43***	0.43***
x	Insecticide applications	0.00	-0.13	-0.19*	0.23**	0.03	0.26**	0.02	-0.23**	0.20*	0.22**	-0.07	0.19*	-0.04	0.16*	-0.24**	0.25**	0.21*	0.05	0.01	0.11	-0.14	-0.11	0.12	0.03	0.13	0.30***	0.36***	0.33***
